# Supplementary material for: Cross-tolerance evolution is driven by selection on heat tolerance in Drosophila subobscura
Source: PeerJ journal article supplement (doi:10.7717/peerj.19743), 2025-07-28
Supplement: Cross-tolerance_evolution_SuppMat.pdf [file Cross-tolerance_evolution_SuppMat.pdf]

## **Supplementary Material**

### **Cross-tolerance evolution is driven by selection on heat tolerance in *Drosophila subobscura***

**Figure S1.** Diagram of the experimental design.

**Table S1.** Descriptive statistics of knockdown time of *Drosophila subobscura*.

**Table S2.** Results of the mixed-linear models on the knockdown time of *Drosophila subobscura*.

**Table S3.** Tukey's contrast analysis for the knockdown time of *Drosophila subobscura*.

**Table S4.** Thermal-death-time (TDT) curves for *Drosophila subobscura*.

**Table S5.** Results of the desiccation survival of *Drosophila subobscura*.

**Table S6.** Results of the starvation survival of *Drosophila subobscura*.

**Figure S1.** Diagram of the experimental design: 100 isofemale lines from *Drosophila subobscura* were used to establish an outbred population. The F1 of these isofemale lines were transferred to a population cage and the F2 flies were divided into three replicates: R1, R2, and R3. After 3 generations, each population cage was divided into four population cages, which were assigned to four different artificial selection protocols in triplicate: fast-ramping selection, fast-ramping control, slow-ramping selection, and slow-ramping control lines. During 16 generations, heat tolerance was selected for 33% highest values of knockdown temperature using two different selection protocols: slow ramping rate (0.08 °C/min) and fast ramping rate (0.4 °C/min). Traits were evaluated at generation 23 and 24.

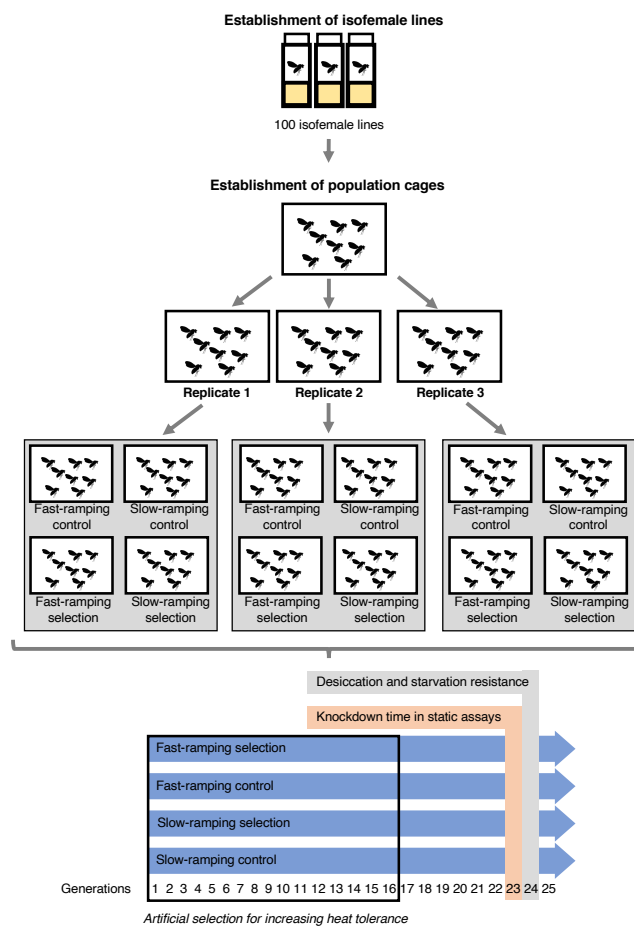

**Table S1.** Mean (SD) knockdown time of *Drosophila subobscura* flies assayed at four static temperatures. Values are organized by sex, selection protocol, and replicate cage.

| Selection protocol     | Replicated cage | Females                      |                              |                              |                              | Males                        |                              |                              |                              |
|------------------------|-----------------|------------------------------|------------------------------|------------------------------|------------------------------|------------------------------|------------------------------|------------------------------|------------------------------|
|                        |                 | Knockdown time at 35°C (min) | Knockdown time at 36°C (min) | Knockdown time at 37°C (min) | Knockdown time at 38°C (min) | Knockdown time at 35°C (min) | Knockdown time at 36°C (min) | Knockdown time at 37°C (min) | Knockdown time at 38°C (min) |
| Fast-ramping control   | R1              | 28.91 (1.48)                 | 14.66 (1.20)                 | 7.34 (1.31)                  | 6.17 (1.34)                  | 25.39 (1.56)                 | 14.09 (1.42)                 | 7.95 (1.36)                  | 5.73 (1.77)                  |
|                        | R2              | 33.71 (1.26)                 | 13.86 (1.49)                 | 6.94 (1.39)                  | 5.95 (1.44)                  | 30.02 (1.25)                 | 15.00 (1.41)                 | 6.49 (1.58)                  | 5.55 (1.51)                  |
|                        | R3              | 30.13 (1.54)                 | 15.51 (1.36)                 | 7.88 (1.49)                  | 6.75 (1.35)                  | 33.64 (1.48)                 | 15.38 (1.46)                 | 5.60 (1.55)                  | 5.33 (1.53)                  |
| Slow-ramping control   | R1              | 34.30 (1.49)                 | 15.80 (1.43)                 | 6.91 (1.25)                  | 5.74 (1.26)                  | 25.43 (1.42)                 | 12.07 (1.34)                 | 5.86 (1.58)                  | 5.65 (1.50)                  |
|                        | R2              | 38.16 (1.51)                 | 10.86 (1.46)                 | 7.31 (1.18)                  | 5.82 (1.80)                  | 28.15 (1.60)                 | 13.75 (1.26)                 | 7.25 (1.34)                  | 5.63 (2.14)                  |
|                        | R3              | 33.84 (1.67)                 | 13.80 (1.64)                 | 7.09 (1.59)                  | 5.42 (1.44)                  | 31.18 (1.37)                 | 13.34 (1.63)                 | 7.62 (1.34)                  | 5.04 (1.48)                  |
| Fast-ramping selection | R1              | 31.83 (1.35)                 | 22.08 (1.55)                 | 10.52 (1.64)                 | 7.64 (1.41)                  | 30.56 (1.58)                 | 16.81 (1.43)                 | 11.12 (1.52)                 | 5.58 (1.24)                  |
|                        | R2              | 37.69 (1.21)                 | 18.30 (1.43)                 | 9.02 (1.30)                  | 7.87 (1.34)                  | 39.11 (1.37)                 | 19.14 (1.30)                 | 11.94 (1.33)                 | 4.91 (1.69)                  |
|                        | R3              | 37.45 (1.46)                 | 17.20 (1.89)                 | 9.17 (1.38)                  | 7.81 (1.57)                  | 32.45 (1.21)                 | 16.11 (1.39)                 | 11.08 (1.54)                 | 5.69 (1.69)                  |
| Slow-ramping selection | R1              | 34.72 (1.29)                 | 19.95 (1.42)                 | 9.48 (1.24)                  | 6.54 (1.44)                  | 29.76 (1.50)                 | 18.17 (1.55)                 | 9.73 (1.53)                  | 7.11 (1.22)                  |
|                        | R2              | 32.06 (1.50)                 | 18.09 (1.36)                 | 10.01 (1.30)                 | 7.09 (1.37)                  | 26.38 (1.44)                 | 16.98 (1.34)                 | 6.49 (1.59)                  | 6.82 (1.55)                  |
|                        | R3              | 41.97 (1.29)                 | 18.40 (1.52)                 | 8.36 (1.44)                  | 6.53 (1.51)                  | 33.08 (1.34)                 | 13.81 (1.33)                 | 9.34 (1.42)                  | 5.85 (1.63)                  |

**Table S2.** Results of the mixed-linear models on the knockdown time of *Drosophila subobscura*. Fixed effects were tested by a type III ANOVA, and the random effect was tested by a likelihood ratio test comparing the model with and without the replicate lines. Response variables were squared root transformed. Significant effects ( $P < 0.05$ ) are indicated in bold.

| Knockdown time at 35°C |                 |                                           |          |                               |
|------------------------|-----------------|-------------------------------------------|----------|-------------------------------|
| <i>Fixed effect</i>    | <i>SS</i>       | <i>DF<sub>num</sub>, DF<sub>den</sub></i> | <i>F</i> | <i>P value</i>                |
| Selection              | 1.82            | 3,170                                     | 0.62     | 0.602                         |
| Sex                    | 8.44            | 1,170                                     | 8.64     | <b>0.004</b>                  |
| Selection × Sex        | 1.89            | 3,170                                     | 0.64     | 0.588                         |
| <i>Random effect</i>   | <i>Variance</i> | <i>Likelihood ratio test (df=1)</i>       |          | <i>P value</i>                |
| Replicate(Selection)   | 0.0000          | 0                                         |          | 1                             |
| Error                  | 0.9767          |                                           |          |                               |
| Knockdown time at 36°C |                 |                                           |          |                               |
| <i>Fixed effect</i>    | <i>SS</i>       | <i>DF<sub>num</sub>, DF<sub>den</sub></i> | <i>F</i> | <i>P value</i>                |
| Selection              | 16.68           | 3,232                                     | 9.86     | <b>3.8 × 10<sup>-6</sup></b>  |
| Sex                    | 1.49            | 1,232                                     | 2.65     | 0.10                          |
| Selection × Sex        | 1.25            | 3,232                                     | 0.74     | 0.53                          |
| <i>Random effect</i>   | <i>Variance</i> | <i>Likelihood ratio test (df=1)</i>       |          | <i>P value</i>                |
| Replicate(Selection)   | 0.0000          | 0                                         |          | 1                             |
| Error                  | 0.5639          |                                           |          |                               |
| Knockdown time at 37°C |                 |                                           |          |                               |
| <i>Fixed effect</i>    | <i>SS</i>       | <i>DF<sub>num</sub>, DF<sub>den</sub></i> | <i>F</i> | <i>P value</i>                |
| Selection              | 14.96           | 3,223                                     | 18.75    | <b>7.0 × 10<sup>-11</sup></b> |
| Sex                    | 0.002           | 1,223                                     | 0.009    | 0.93                          |
| Selection × Sex        | 1.58            | 3,223                                     | 1.99     | 0.12                          |
| <i>Random effect</i>   | <i>Variance</i> | <i>Likelihood ratio test (df=1)</i>       |          | <i>P value</i>                |
| Replicate(Selection)   | 0.0000          | 0                                         |          | 1                             |
| Error                  | 0.2656          |                                           |          |                               |
| Knockdown time at 38°C |                 |                                           |          |                               |
| <i>Fixed effect</i>    | <i>SS</i>       | <i>DF<sub>num</sub>, DF<sub>den</sub></i> | <i>F</i> | <i>P value</i>                |
| Selection              | 1.69            | 3,224                                     | 2.27     | 0.08                          |
| Sex                    | 1.42            | 1,224                                     | 5.70     | <b>0.02</b>                   |
| Selection × Sex        | 1.74            | 3,224                                     | 2.33     | 0.08                          |
| <i>Random effect</i>   | <i>Variance</i> | <i>Likelihood ratio test (df=1)</i>       |          | <i>P value</i>                |
| Replicate(Selection)   | 0.0000          | 0                                         |          | 1                             |
| Error                  | 0.2485          |                                           |          |                               |

**Table S3.** Tukey's contrast analysis for the knockdown time of *Drosophila subobscura* assayed in four static temperature assays. P values were corrected using the false discovery rate method. Significant differences ( $P < 0.05$ ) are indicated in bold.

**Knockdown time at 35°C**

No selection effect

**Knockdown time at 36°C**

| <i>Contrasts</i>                | <i>df</i> | <i>t</i> | <i>P value</i> |
|---------------------------------|-----------|----------|----------------|
| slow-control vs. fast-control   | 8         | -1.426   | 0.230          |
| slow-control vs. slow-selected  | 8         | -3.994   | <b>0.012</b>   |
| slow-control vs. fast-selected  | 8         | -4.773   | <b>0.008</b>   |
| fast-control vs. slow-selected  | 8         | -2.568   | 0.050          |
| fast-control vs. fast-selected  | 8         | -3.347   | <b>0.020</b>   |
| slow-selected vs. fast-selected | 8         | -0.779   | 0.458          |

**Knockdown time at 37°C**

| <i>Contrasts</i>                | <i>df</i> | <i>t</i> | <i>P value</i> |
|---------------------------------|-----------|----------|----------------|
| slow-control vs. fast-control   | 7.91      | -0.010   | 0.992          |
| slow-control vs. slow-selected  | 8.06      | -3.432   | <b>0.013</b>   |
| slow-control vs. fast-selected  | 7.64      | -6.368   | <b>0.001</b>   |
| fast-control vs. slow-selected  | 8.33      | -3.392   | <b>0.013</b>   |
| fast-control vs. fast-selected  | 7.91      | -6.302   | <b>0.001</b>   |
| slow-selected vs. fast-selected | 8.06      | -2.841   | <b>0.026</b>   |

**Knockdown time at 38°C**

No selection effect

**Table S4.** Thermal-death-time (TDT) parameters calculated from heat tolerance measurements for *Drosophila subobscura*.

| Selection regimen      | Replicate | Sex     | TDT curve                          | CT <sub>max</sub> (°C) | z (°C) | r <sup>2</sup> | Q <sub>10</sub> |
|------------------------|-----------|---------|------------------------------------|------------------------|--------|----------------|-----------------|
| Fast-ramping control   | R1        | females | $\log_{10} t = 9.6218 - 0.2338 T$  | 41.15                  | 4.28   | 0.9425         | 217.84          |
|                        | R2        | females | $\log_{10} t = 10.3173 - 0.2527 T$ | 40.83                  | 3.96   | 0.9297         | 336.39          |
|                        | R3        | females | $\log_{10} t = 9.4471 - 0.2281 T$  | 41.42                  | 4.38   | 0.9469         | 190.81          |
|                        | R1        | males   | $\log_{10} t = 8.8691 - 0.2132 T$  | 41.61                  | 4.69   | 0.9637         | 135.36          |
|                        | R2        | males   | $\log_{10} t = 10.1218 - 0.2478 T$ | 40.85                  | 4.03   | 0.9484         | 300.91          |
|                        | R3        | males   | $\log_{10} t = 11.3142 - 0.2803 T$ | 40.36                  | 3.57   | 0.9147         | 635.93          |
| Slow-ramping control   | R1        | females | $\log_{10} t = 11.1809 - 0.2761 T$ | 40.49                  | 3.62   | 0.9455         | 577.29          |
|                        | R2        | females | $\log_{10} t = 10.2409 - 0.2506 T$ | 40.87                  | 3.99   | 0.8199         | 320.36          |
|                        | R3        | females | $\log_{10} t = 11.0648 - 0.2731 T$ | 40.52                  | 3.66   | 0.9572         | 538.05          |
|                        | R1        | males   | $\log_{10} t = 9.1095 - 0.2214 T$  | 41.15                  | 4.52   | 0.8985         | 163.61          |
|                        | R2        | males   | $\log_{10} t = 9.2449 - 0.2235 T$  | 41.37                  | 4.47   | 0.9132         | 171.69          |
|                        | R3        | males   | $\log_{10} t = 10.6311 - 0.2618 T$ | 40.61                  | 3.82   | 0.9760         | 414.62          |
| Fast-ramping selection | R1        | females | $\log_{10} t = 9.0865 - 0.2155 T$  | 42.16                  | 4.64   | 0.9789         | 143.04          |
|                        | R2        | females | $\log_{10} t = 9.6911 - 0.2329 T$  | 41.60                  | 4.29   | 0.9357         | 213.53          |
|                        | R3        | females | $\log_{10} t = 9.7291 - 0.2336 T$  | 41.65                  | 4.28   | 0.9337         | 216.83          |
|                        | R1        | males   | $\log_{10} t = 10.2040 - 0.2479 T$ | 41.15                  | 4.03   | 0.9875         | 301.61          |
|                        | R2        | males   | $\log_{10} t = 10.1460 - 0.2463 T$ | 41.20                  | 4.06   | 0.9783         | 290.34          |
|                        | R3        | males   | $\log_{10} t = 9.5585 - 0.2302 T$  | 41.52                  | 4.34   | 0.9863         | 200.49          |

|                           |    |         |                                    |       |      |        |        |
|---------------------------|----|---------|------------------------------------|-------|------|--------|--------|
| Slow-ramping<br>selection | R1 | females | $\log_{10} t = 10.2076 - 0.2474 T$ | 41.25 | 4.04 | 0.9797 | 298.12 |
|                           | R2 | females | $\log_{10} t = 9.4324 - 0.2263 T$  | 41.69 | 4.42 | 0.9840 | 183.12 |
|                           | R3 | females | $\log_{10} t = 11.0759 - 0.2711 T$ | 40.86 | 3.69 | 0.9551 | 513.69 |
|                           | R1 | males   | $\log_{10} t = 9.2689 - 0.2219 T$  | 41.77 | 4.51 | 0.9895 | 165.59 |
|                           | R2 | males   | $\log_{10} t = 9.8391 - 0.2120 T$  | 41.70 | 4.72 | 0.8784 | 131.73 |
|                           | R3 | males   | $\log_{10} t = 9.6621 - 0.2339 T$  | 41.31 | 4.27 | 0.9567 | 218.37 |

---

**Table S5.** Results of the desiccation survival analysis testing the effect of selection protocol, sex, and their interaction in *Drosophila subobscura*. Significant effects ( $P < 0.05$ ) are indicated in bold.

| Effect                         | exp(coefficient) | z      | P value                    |
|--------------------------------|------------------|--------|----------------------------|
| Slow-ramping selection         | 0.422            | −2.623 | <b>0.009</b>               |
| Fast-ramping selection         | 0.556            | −1.797 | 0.072                      |
| Males                          | 7.108            | 5.242  | <b>1.6×10<sup>−7</sup></b> |
| Slow-ramping selection – males | 1.773            | 1.264  | 0.206                      |
| Fast-ramping selection –males  | 1.391            | 0.731  | 0.465                      |

  

| Selection treatment    | vials | Median (h) | 95% CI (h)   |
|------------------------|-------|------------|--------------|
| <i>Females</i>         |       |            |              |
| Control                | 21    | 18.3       | 11.9 – 25.5  |
| Slow-ramping selection | 21    | 26.1       | 20.7 – 29.1  |
| Fast-ramping selection | 21    | 21.9       | 15.3 – 27.3  |
| <i>Males</i>           |       |            |              |
| Control                | 21    | 5.81       | 4.51 – 7.50  |
| Slow-ramping selection | 21    | 5.81       | 4.51 – 10.49 |
| Fast-ramping selection | 21    | 5.81       | 5.10 – 9.23  |

  

| Sex     | vials | Median (h) | 95% CI (h)  |
|---------|-------|------------|-------------|
| Females | 63    | 21.87      | 19.5 – 25.5 |
| Males   | 63    | 5.81       | 5.61 – 6.3  |



**Table S6.** Results of the starvation survival analysis testing the effect of selection protocol, sex, and their interaction in *Drosophila subobscura*. Significant effects ( $P < 0.05$ ) are indicated in bold.

| <b>Effect</b>                  | <b>exp(coefficient)</b> | <b>z</b> | <b>P value</b>                |
|--------------------------------|-------------------------|----------|-------------------------------|
| Slow-ramping selection         | 2.062                   | 2.240    | <b>0.025</b>                  |
| Fast-ramping selection         | 2.268                   | 2.474    | <b>0.013</b>                  |
| Males                          | 22.749                  | 8.212    | <b>&lt;2×10<sup>-16</sup></b> |
| Slow-ramping selection – males | 0.223                   | –3.305   | <b>0.0009</b>                 |
| Fast-ramping selection –males  | 0.218                   | –3.273   | <b>0.001</b>                  |

  

| <b>Selection treatment</b> | <b>vials</b> | <b>Median (h)</b> | <b>95% CI (h)</b> |
|----------------------------|--------------|-------------------|-------------------|
| <i>Females</i>             |              |                   |                   |
| Control                    | 21           | 53.0              | 46.5 – 58.5       |
| Slow-ramping selection     | 21           | 42.9              | 41.1 – 50.7       |
| Fast-ramping selection     | 21           | 44.7              | 39.3 – 50.1       |
| <i>Males</i>               |              |                   |                   |
| Control                    | 21           | 25.5              | 24.9 – 28.5       |
| Slow-ramping selection     | 21           | 30.3              | 27.9 – 33.3       |
| Fast-ramping selection     | 21           | 26.7              | 24.9 – 32.7       |

  

| <b>Sex</b> | <b>vials</b> | <b>Median (h)</b> | <b>95% CI (h)</b> |
|------------|--------------|-------------------|-------------------|
| Females    | 63           | 46.5              | 42.9 – 50.1       |
| Males      | 63           | 27.3              | 26.1 – 29.1       |
